# Supplementary material
Source: PubMed Central journal article supplement (PMC3183239)
Supplement: NIHMS315068-supplement-Supp_Material.pdf [file NIHMS315068-supplement-Supp_Material.pdf]

## Supporting Information: Individual-by-individual listing of GenBank numbers

|            |           | <i>O. longicaudatus</i> | <i>O. longicaudatus</i> | <i>Andes virus</i> |
|------------|-----------|-------------------------|-------------------------|--------------------|
| Individual | Locality  | Cytb                    | D-loop                  | S-segment          |
| MAU001     | El Mauro  | JN034440                |                         |                    |
| MAU002     | El Mauro  | JN034441                |                         |                    |
| MAU003     | El Mauro  | JN034442                |                         |                    |
| MAU004     | El Mauro  | JN034443                |                         |                    |
| MAU005     | El Mauro  | JN034444                |                         |                    |
| MAU006     | El Mauro  | JN034445                |                         |                    |
| MAU007     | El Mauro  | JN034446                |                         |                    |
| MAU008     | El Mauro  | JN034447                |                         |                    |
| MAU009     | El Mauro  | JN034448                |                         |                    |
| MAU010     | El Mauro  | JN034449                |                         |                    |
| QUI056     | Quilamuta | JN034450                |                         |                    |
| QUI057     | Quilamuta | JN034451                |                         |                    |
| QUI058     | Quilamuta | JN034452                |                         |                    |
| QUI059     | Quilamuta | JN034453                |                         |                    |
| QUI062     | Quilamuta | JN034454                |                         |                    |
| QUI063     | Quilamuta | JN034455                |                         |                    |
| QUI064     | Quilamuta | JN034456                |                         |                    |
| QUI065     | Quilamuta | JN034457                |                         |                    |
| DUA501     | Duao      | JN034458                |                         | EU241675           |
| DUA503     | Duao      | JN034459                |                         |                    |
| DUA505     | Duao      | JN034460                | JN034530                | EU241676           |
| DUA506     | Duao      | JN034461                |                         |                    |
| DUA511     | Duao      | JN034462                |                         |                    |
| DUA512     | Duao      | JN034463                |                         |                    |
| DUA513     | Duao      | JN034464                |                         |                    |
| DUA519     | Duao      | JN034465                |                         |                    |
| DUA520     | Duao      | JN034466                |                         |                    |
| DUA521     | Duao      | JN034467                |                         |                    |
| TUC949     | Tucapel   | JN034468                |                         |                    |
| TUC956     | Tucapel   | JN034469                |                         |                    |
| TUC957     | Tucapel   | JN034470                |                         |                    |
| TUC959     | Tucapel   | JN034471                |                         |                    |
| TUC963     | Tucapel   | JN034472                |                         |                    |
| TUC966     | Tucapel   | JN034473                |                         |                    |
| TUC974     | Tucapel   | JN034474                |                         |                    |
| TUC977     | Tucapel   | JN034475                |                         |                    |
| TUC979     | Tucapel   | JN034476                | JN034531                | EU241694           |
| CAR603     | Carahue   | JN034477                |                         |                    |

|        |                  |           |          |          |
|--------|------------------|-----------|----------|----------|
| CAR604 | Carahue          | JN034478  |          |          |
| CAR606 | Carahue          | JN034479  |          |          |
| CAR612 | Carahue          | JN034480  |          |          |
| CAR613 | Carahue          | JN034481  |          | EU241683 |
| CAR614 | Carahue          | JN034482  |          |          |
| PAN972 | Panguipulli      | AY 275694 |          |          |
| PAN975 | Panguipulli      | JN034483  |          |          |
| PAN979 | Panguipulli      | JN034484  |          |          |
| PAN995 | Panguipulli      | JN034485  |          |          |
| PAN535 | Panguipulli      | JN034486  | JN034534 | EU241698 |
| PAN544 | Panguipulli      | JN034487  |          | EU241699 |
| PAN549 | Panguipulli      | JN034488  |          |          |
| PAN577 | Panguipulli      | JN034489  |          |          |
| PAN841 | Panguipulli      | JN034490  |          |          |
| PAN850 | Panguipulli      | JN034491  |          |          |
| PAN851 | Panguipulli      | JN034492  |          |          |
| CHE638 | Chiloe           | JN034493  |          |          |
| CHE639 | Chiloe           | JN034494  |          |          |
| CHE640 | Chiloe           | JN034495  |          |          |
| CHE646 | Chiloe           | AY 275696 |          |          |
| CHE648 | Chiloe           | JN034496  |          |          |
| CHE656 | Chiloe           | JN034497  |          |          |
| CHE658 | Chiloe           | JN034498  |          |          |
| CHE445 | Chiloe           | JN034499  |          |          |
| CHE447 | Chiloe           | JN034500  |          |          |
| CHE452 | Chiloe           | JN034501  |          |          |
| CHE461 | Chiloe           | JN034502  |          |          |
| CC369  | Chile Chico      | JN034503  |          |          |
| CC374  | Chile Chico      | JN034504  |          |          |
| CC377  | Chile Chico      | JN034505  |          |          |
| CC378  | Chile Chico      | JN034506  | JN034536 | EU241702 |
| CC384  | Chile Chico      | JN034507  |          |          |
| CC385  | Chile Chico      | JN034508  |          |          |
| CC386  | Chile Chico      | JN034509  |          |          |
| CC387  | Chile Chico      | JN034510  |          | EU241685 |
| CC389  | Chile Chico      | JN034511  |          |          |
| CC398  | Chile Chico      | JN034512  |          |          |
| TP649  | Torres del Paine | AY 452197 |          |          |
| TP650  | Torres del Paine | AY 452198 |          |          |
| TP675  | Torres del Paine | JN034513  |          |          |

|           |                  |          |          |          |
|-----------|------------------|----------|----------|----------|
| TP680     | Torres del Paine | JN034514 |          |          |
| TP682     | Torres del Paine | JN034515 |          |          |
| TP683     | Torres del Paine | JN034516 |          |          |
| TP684     | Torres del Paine | JN034517 |          |          |
| TP696     | Torres del Paine | JN034518 |          |          |
| TP703     | Torres del Paine | JN034519 |          |          |
| TP706     | Torres del Paine | JN034520 |          |          |
| TP707     | Torres del Paine | JN034521 |          |          |
| TP718     | Torres del Paine | JN034522 |          |          |
| Cur092    | Curico           | JN034523 | JN034528 | EU241692 |
| Hue362    | Huerquehue       | JN034524 | JN034532 | EU241695 |
| FJ95728   | Fray Jorge       | GQ282502 |          |          |
| FJ95735   | Fray Jorge       | GQ282503 |          |          |
| FJ95736   | Fray Jorge       | GQ282504 |          |          |
| FJ96876   | Fray Jorge       | GQ282505 |          |          |
| FJ96887   | Fray Jorge       | GQ282506 | JN034525 | EU241690 |
| FJ96890   | Fray Jorge       | GQ282507 |          |          |
| FJ96892   | Fray Jorge       | GQ282508 |          |          |
| FJ96896   | Fray Jorge       | GQ282509 |          |          |
| FJ96914   | Fray Jorge       | GQ282510 |          |          |
| FJ109249  | Fray Jorge       | GQ282511 |          |          |
| LVi108856 | Los Vilos        | GQ282512 |          |          |
| LVi108857 | Los Vilos        | GQ282513 |          |          |
| LVi108858 | Los Vilos        | GQ282514 |          |          |
| LVi108859 | Los Vilos        | GQ282515 | JN034526 | EU241665 |
| LVi108860 | Los Vilos        | GQ282516 |          |          |
| LVi108862 | Los Vilos        | GQ282517 |          |          |
| LVi108864 | Los Vilos        | GQ282518 |          |          |
| LVi108865 | Los Vilos        | GQ282519 |          |          |
| LVi108869 | Los Vilos        | GQ282520 |          |          |
| LVi120721 | Los Vilos        | GQ282521 |          |          |
| SCA95299  | Apoquindo        | AF346568 |          |          |
| SCA95551  | Apoquindo        | GQ282522 |          |          |
| SCA95674  | Apoquindo        | GQ282523 |          |          |
| SCA96150  | Apoquindo        | GQ282524 |          |          |
| SCA96325  | Apoquindo        | GQ282525 |          | EU241666 |
| SCA104605 | Apoquindo        | GQ282526 |          |          |

|            |            |          |          |          |
|------------|------------|----------|----------|----------|
| SCA104619  | Apoquindo  | GQ282527 | JN034527 | EU241691 |
| SCA104647  | Apoquindo  | GQ282528 |          |          |
| SCA104648  | Apoquindo  | GQ282529 |          |          |
| SCA105004  | Apoquindo  | GQ282530 |          |          |
| SCA105110  | Apoquindo  | GQ282531 |          | EU241667 |
| Ruil108830 | Los Ruiles | GQ282532 |          |          |
| Ruil108840 | Los Ruiles | GQ282533 |          |          |
| Ruil108841 | Los Ruiles | GQ282534 |          |          |
| Ruil108843 | Los Ruiles | GQ282535 | JN034529 | EU241693 |
| Ruil108844 | Los Ruiles | GQ282536 |          |          |
| Ruil108848 | Los Ruiles | GQ282537 |          |          |
| Ruil108851 | Los Ruiles | GQ282538 |          |          |
| Ruil108852 | Los Ruiles | GQ282539 |          |          |
| Ruil108854 | Los Ruiles | GQ282540 |          |          |
| Ruil108855 | Los Ruiles | GQ282541 |          |          |
| Tome120050 | Tome       | GQ282542 |          |          |
| Tome120057 | Tome       | GQ282543 |          |          |
| Tome120058 | Tome       | GQ282544 |          |          |
| Tome120059 | Tome       | GQ282545 |          |          |
| Tome120060 | Tome       | GQ282546 |          |          |
| Tome120062 | Tome       | GQ282547 |          |          |
| Tome120076 | Tome       | GQ282548 |          | EU241680 |
| Tome120077 | Tome       | GQ282549 |          |          |
| Tome120086 | Tome       | GQ282550 |          |          |
| Tome120087 | Tome       | GQ282551 |          |          |
| Nah106477  | Nahuelbuta | GQ282552 |          |          |
| Nah106479  | Nahuelbuta | GQ282553 |          |          |
| Nah106480  | Nahuelbuta | GQ282554 |          |          |
| Nah106481  | Nahuelbuta | GQ282555 |          |          |
| Nah106482  | Nahuelbuta | GQ282556 |          |          |
| Nah106484  | Nahuelbuta | GQ282557 |          |          |
| Nah106485  | Nahuelbuta | GQ282558 |          |          |
| PNV95048   | Villarrica | AY275692 |          |          |
| PNV95070   | Villarrica | GQ282559 |          |          |
| PNV95073   | Villarrica | GQ282560 |          |          |
| PNV95083   | Villarrica | AF346566 | JN034533 | EU241696 |
| PNV95093   | Villarrica | GQ282561 |          |          |
| PNV104766  | Villarrica | GQ282562 |          |          |
| PNV105148  | Villarrica | GQ282563 |          |          |
| PNV109042  | Villarrica | GQ282564 |          |          |
| PNV109043  | Villarrica | GQ282565 |          |          |

|           |                    |          |          |          |
|-----------|--------------------|----------|----------|----------|
| PNV109046 | Villarrica         | GQ282566 |          |          |
| PNV120438 | Villarrica         | GQ282567 |          |          |
| QUET95370 | Villarrica         | AY275693 |          |          |
| Puy108798 | Puyehue            | GQ282568 |          |          |
| Puy108801 | Puyehue            | GQ282569 |          |          |
| Puy108803 | Puyehue            | GQ282570 |          |          |
| Puy108805 | Puyehue            | GQ282571 |          |          |
| Puy108807 | Puyehue            | GQ282572 |          |          |
| Puy108808 | Puyehue            | GQ282573 |          |          |
| Puy108810 | Puyehue            | GQ282574 |          |          |
| Puy108814 | Puyehue            | GQ282575 |          |          |
| Puy108816 | Puyehue            | GQ282576 |          |          |
| Puy108817 | Puyehue            | GQ282577 |          |          |
| RS96548   | Rio Simpson        | GQ282578 |          |          |
| RS96552   | Rio Simpson        | GQ282579 |          |          |
| RS96555   | Rio Simpson        | GQ282580 | JN034535 | EU241700 |
| RS96560   | Rio Simpson        | GQ282581 |          |          |
| RS96562   | Rio Simpson        | AY275698 |          |          |
| RS96565   | Rio Simpson        | GQ282582 |          |          |
| RS96566   | Rio Simpson        | GQ282583 |          | EU241701 |
| RS105416  | Rio Simpson        | GQ282584 |          |          |
| RS105420  | Rio Simpson        | GQ282585 |          |          |
| RIB95957  | Rio Ibanez         | AY275699 |          |          |
| Rlb105272 | Rio Ibanez         | GQ282586 |          |          |
| Rlb105276 | Rio Ibanez         | GQ282587 |          |          |
| Rlb105284 | Rio Ibanez         | GQ282588 |          |          |
| Rlb105288 | Rio Ibanez         | GQ282589 |          |          |
| Rlb105292 | Rio Ibanez         | GQ282590 |          |          |
| Rlb105303 | Rio Ibanez         | GQ282591 |          |          |
| Rlb105306 | Rio Ibanez         | GQ282592 |          |          |
| Rlb105307 | Rio Ibanez         | GQ282593 |          |          |
| Rlb105318 | Rio Ibanez         | GQ282594 |          |          |
| LAt108895 | Lago<br>Atravesado | GQ282595 |          |          |
| LAt108906 | Lago<br>Atravesado | GQ282596 |          |          |
| LAt108914 | Lago<br>Atravesado | GQ282597 |          |          |
| LAt108929 | Lago<br>Atravesado | GQ282598 |          |          |
| LAt108935 | Lago<br>Atravesado | GQ282599 |          |          |
| LAt108940 | Lago<br>Atravesado | GQ282600 |          |          |

|           |                    |          |  |  |
|-----------|--------------------|----------|--|--|
| LAt108941 | Lago<br>Atravesado | GQ282601 |  |  |
| LAt108961 | Lago<br>Atravesado | GQ282602 |  |  |
| LAt108962 | Lago<br>Atravesado | GQ282603 |  |  |
