# Supplementary material
Source: PubMed Central journal article supplement (PMC3183239)
Supplement: NIHMS315068-supplement-Supp_Table_S1-S2___Fig_S1.pdf [file NIHMS315068-supplement-Supp_Table_S1-S2___Fig_S1.pdf]

**Supporting information for:**

**Spatial but not Temporal Co-divergence of a Virus and its Mammalian**

**Host**

FERNANDO TORRES-PÉREZ, R. EDUARDO PALMA, BRIAN HJELLE, EDWARD  
C. HOLMES, JOSEPH A. COOK

Table S1. Sampling localities, numbers in Figure 1, number of sequences (N), and  
coordinates (in decimal degrees) for Andes virus (ANDV) and *O. longicaudatus* (OL)

| Locality                   | ANDV Map<br>number | ANDV<br>(N) | OL Map<br>number | OL (N) | Latitude | Longitude |
|----------------------------|--------------------|-------------|------------------|--------|----------|-----------|
| Fray Jorge                 | 1                  | 2           | 1                | 10     | -30.64   | -71.68    |
| Los Vilos                  | 2                  | 1           | 2                | 10     | -31.83   | -71.52    |
| El Mauro                   |                    |             | 3                | 10     | -31.98   | -71       |
| San Carlos de<br>Apoquindo | 3                  | 3           | 4                | 11     | -33.46   | -70.48    |
| Peñaflor                   | 3                  | 1           |                  |        | -33.57   | -70.82    |
| Lo Herrera                 | 3                  | 1           |                  |        | -33.57   | -70.67    |
| Quebrada de la<br>Plata    | 4                  | 1           |                  |        | -33.49   | -70.89    |
| Melipilla                  | 5                  | 1           |                  |        | -33.73   | -71.21    |
| Quilamuta                  |                    |             | 5                | 8      | -34.06   | -71.29    |
| Picarquín                  | 6                  | 1           |                  |        | -33.96   | -70.63    |
| Nancahua                   | 7                  | 1           |                  |        | -34.6    | -71.2     |

---

|                 |    |   |    |    |        |        |
|-----------------|----|---|----|----|--------|--------|
| Curicó          | 8  | 1 | 21 | 1  | -34.59 | -71.19 |
| San Fernando    | 9  | 1 |    |    | -34.76 | -70.77 |
| Duao            | 10 | 2 | 6  | 10 | -34.88 | -72.15 |
| Los Ruiles      | 11 | 1 | 7  | 10 | -35.83 | -72.5  |
| Chillán         | 12 | 2 |    |    | -36.65 | -71.99 |
| Tomé            | 13 | 1 | 8  | 10 | -36.64 | -72.79 |
| Concepción      | 14 | 1 |    |    | -36.78 | -73.01 |
| Tucapel         | 15 | 1 | 9  | 9  | -37.24 | -71.79 |
| Quilleco        | 16 | 2 |    |    | -37.45 | -71.97 |
| Los Angeles     | 17 | 1 |    |    | -37.56 | -72.54 |
| P.N. Nahuelbuta |    |   | 10 | 7  | -37.79 | -73    |
| Carahue         | 18 | 1 | 11 | 6  | -38.52 | -73.11 |
| Temuco          | 19 | 1 |    |    | -38.69 | -72.61 |
| P.N. Huerquehue | 20 | 1 | 22 | 1  | -39.17 | -71.73 |
| P.N. Villarrica | 21 | 1 | 12 | 12 | -39.45 | -71.81 |
| Neltume         | 22 | 1 |    |    | -39.57 | -71.77 |
| Panguipulli     | 23 | 2 | 13 | 11 | -39.73 | -72.22 |
| Puyehue         |    |   | 14 | 10 | -40.72 | -72.43 |
| Chiloé          | 24 | 1 | 15 | 11 | -41.88 | -73.67 |
| Aysén           | 25 | 2 |    |    | -45.4  | -72.7  |
| R.N. Río        | 26 | 2 | 16 | 9  | -45.46 | -72.32 |
| Simpson         |    |   |    |    |        |        |
| Lago Atravesado |    |   | 17 | 9  | -45.67 | -72.32 |

---

---

|                 |    |   |    |    |        |        |
|-----------------|----|---|----|----|--------|--------|
| Coyhique        | 27 | 3 |    |    | -45.57 | -72.06 |
| RN. Río Ibañez  |    |   | 18 | 10 | -46.18 | -72.77 |
| Chile Chico     | 28 | 2 | 19 | 10 | -46.78 | -72.6  |
| Torres de Paine |    |   | 20 | 12 | -51.28 | -73.09 |

---

Table S2: Selection analyses of ANDV S segment performed in Datamonkey and Selecton servers using 20 sequences and 921 nucleotides.

| DataMonkey     |             |                |       |                |       | SELECTON        |                    |                          |                          |        |       |       |
|----------------|-------------|----------------|-------|----------------|-------|-----------------|--------------------|--------------------------|--------------------------|--------|-------|-------|
| SLAC           |             | FEL            |       | REL            |       | PARRIS          | GA-Branch          | M8a                      | M7                       | M5     | M8    | MEC   |
| Selected sites | dN/dS       | Selected sites | dN/dS | Selected sites | dN/dS | dN/dS           |                    | Ka/Ks                    | Ka/Ks                    | Ka/Ks  | Ka/Ks | Ka/Ks |
| 63             | 0.004<br>05 | 134            | 0     | 196            | 0     | 0.004 ±<br>0.00 | 0.0027 ±<br>0.0056 | 0.0233<br>[1.7e-11,0.21] | 0.0219<br>[1.7e-11,0.21] | 0.0229 | 0.025 | 0.04  |

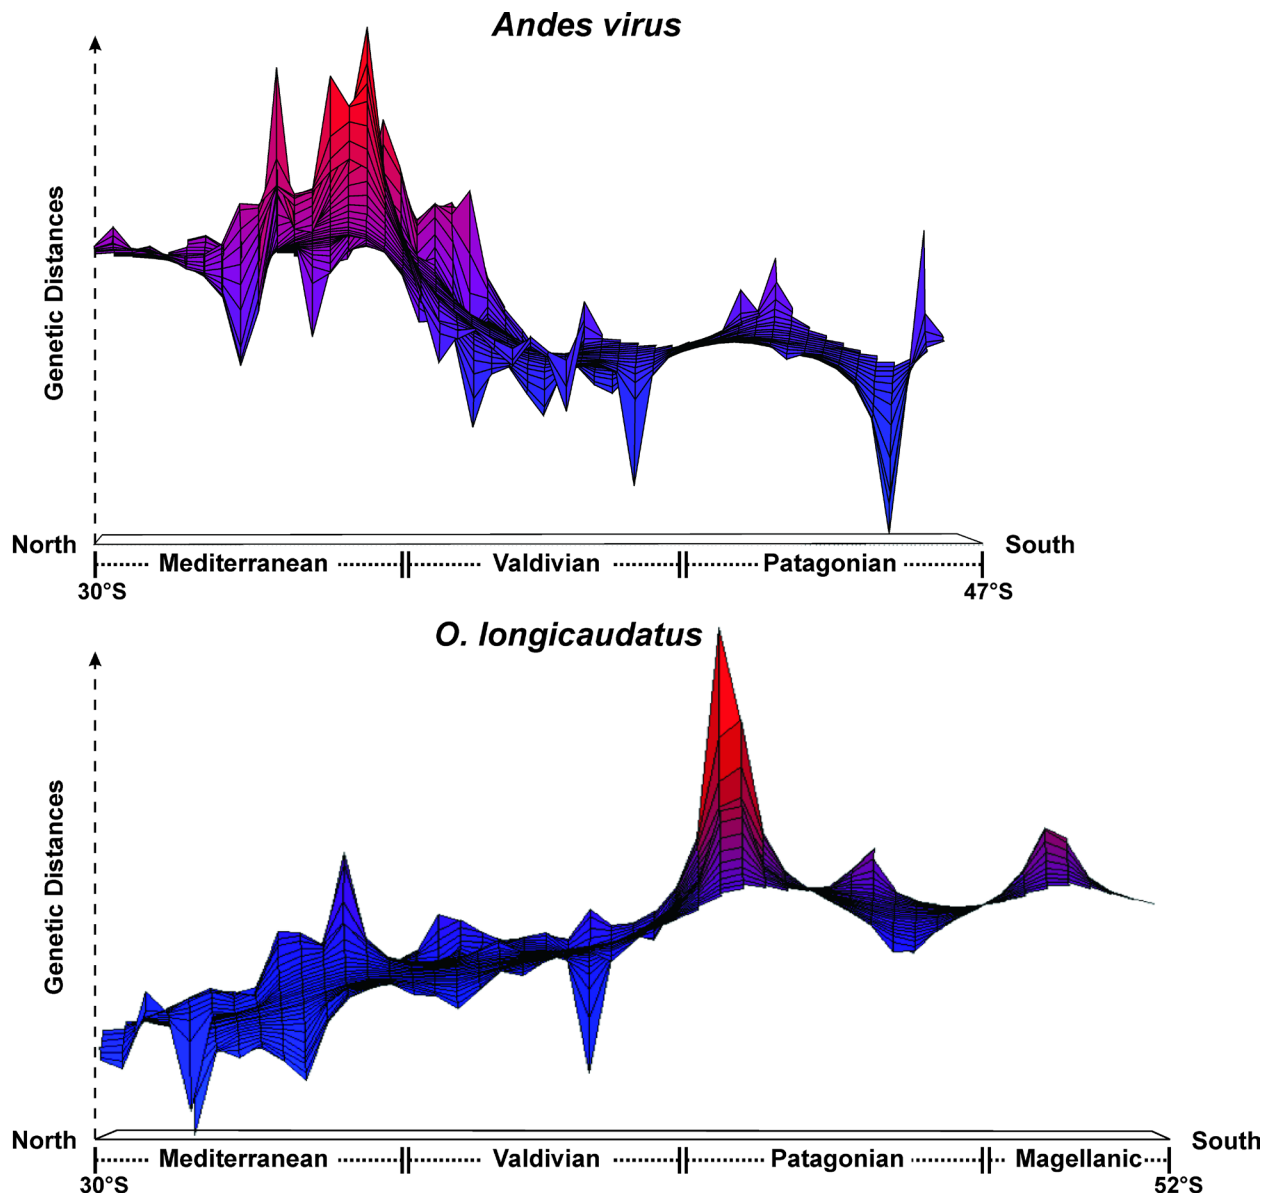

Figure S1. A graphical interpolation-based representation of the genetic structure made using a 50 x 50 grid and a distance weighting parameter of 0.5 for ANDV and 1.0 for *O. longicaudatus*. X- and y- axes represent geographic coordinates. Surface heights along the Z-axis indicate genetic distances. Colors are indicative of areas with high (red) or low (blue) pairwise genetic distance between individuals. All samples (197 sequences) were included for *O. longicaudatus*. Scale at the bottom represents latitude in degrees.
